# Supplementary material
Source: PubMed Central journal article supplement (PMC4258114)
Supplement: NIHMS629774-supplement-Supp_FigureS1-S6.pdf [file NIHMS629774-supplement-Supp_FigureS1-S6.pdf]

## Supporting Information

***spxA2*, encoding a regulator of stress resistance in *Bacillus anthracis*, is controlled by SaiR, a new member of the Rrf2 protein family**

**Michiko M. Nakano<sup>1</sup>, Wren Kominos-Marvell<sup>1</sup>, Bhagyashree Sane<sup>1</sup>, Yaldah Mohammad Nader<sup>1</sup>, Skye M. Barendt<sup>1</sup>, Marcus B. Jones<sup>2</sup>, and Peter Zuber<sup>1\*</sup>**

*<sup>1</sup>Institute of Environmental Health, Oregon Health & Science University, Portland, OR 97239, USA.*

*<sup>2</sup>Craig Venter Institute, La Jolla, CA 92037, USA.*

Tables S1-S4

Figs. S1-S6

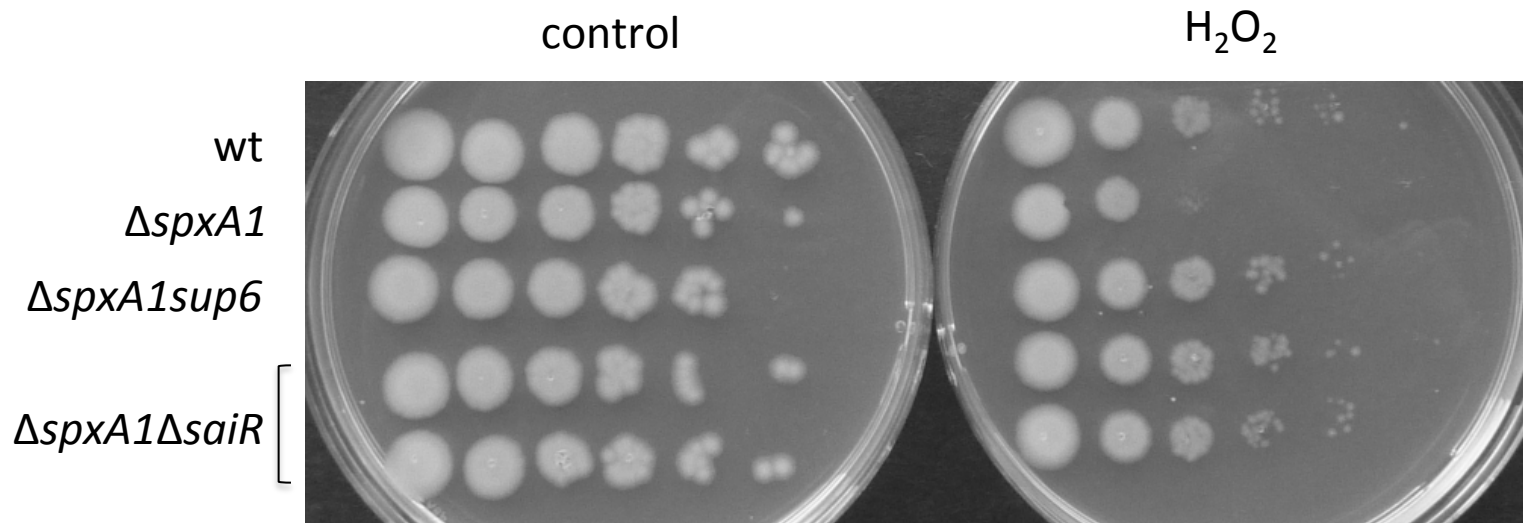

**Fig. S1.** Hydrogen peroxide sensitivity of the  $\Delta spxA1$  mutant is restored by mutations in *saiR*. *B. anthracis* strains were grown in LB until  $OD_{600}$  reached ca. 1.0. Five  $\mu$ l of 10-fold serial dilutions of cells (left to right) were spotted onto LB agar with and without 0.44 mM  $H_2O_2$ . Strains: wt, 7702;  $\Delta spxA1$ , ORB8170;  $\Delta spxA1sup6$ , ORB8492;  $\Delta spxA1\Delta saiR$ , ORB8606. The results are representatives of three experiments.

|        |    |   |   |   |   |   |   |   |   |   |   |   |   |   |   |   |   |   |   |   |   |   |   |   |   |   |   |   |   |   |   |   |   |   |   |   |   |     |
|--------|----|---|---|---|---|---|---|---|---|---|---|---|---|---|---|---|---|---|---|---|---|---|---|---|---|---|---|---|---|---|---|---|---|---|---|---|---|-----|
| BsNsrR | 83 | T | E | D | D | F | N | I | V | E | C | F | D | A | N | K | N | L | C | V | I | S | P | V | C | G | L | K | H | V | L | N | E | A | L | L | A | 118 |
| BaSaiR | 80 | T | S | E | G | A | L | Q | P | K | C | P | E | S | N | - | D | Q | C | I | V | G | - | S | N | M | R | K | V | L | F | T | I | F | L | G | A | 115 |
| BmSaiR | 80 | T | S | E | G | T | L | L | P | K | C | P | E | G | N | - | E | S | C | I | V | G | - | K | N | L | L | S | I | L | L | N | I | F | E | E | A | 115 |
| GtSaiR | 80 | T | S | E | E | T | L | V | P | K | C | P | D | S | N | - | E | N | C | P | I | G | - | R | N | L | S | N | I | L | I | R | V | C | H | N | A | 115 |

Bs: *Bacillus subtilis*

Ba: *Bacillus anthracis*

Bm: *Bacillus methanolicus*

Gt: *Geobacillus thermoglucosidasius*

**Fig. S2.** Amino acid alignment of effector-binding regions of SaiR orthologs with *Bacillus subtilis* NsrR. Numbers indicate amino acid residues of each protein. Shaded are conserved amino acids and the asterisks show three cysteine residues that are ligands of the 4Fe-4S cluster in NsrR.

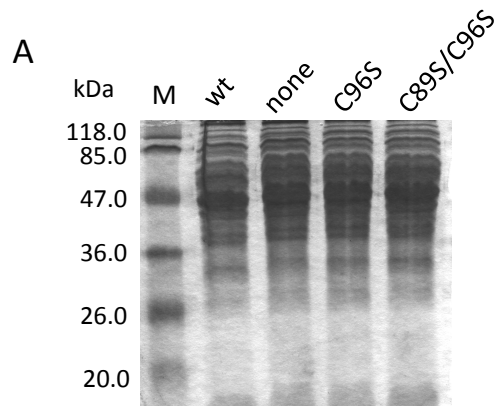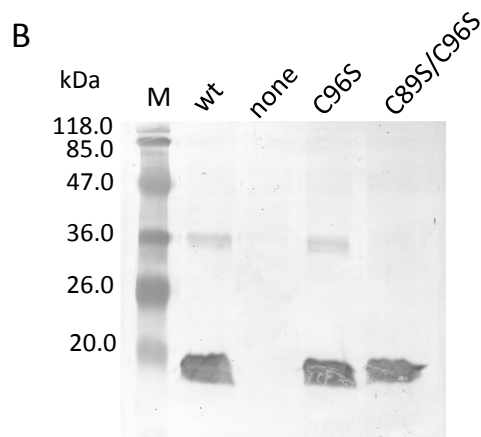

**Fig. S3.** SaiR cysteine mutant proteins are produced in *B. subtilis*. The wild-type and mutant SaiR proteins were induced with 1 mM IPTG for 1 h in *B. subtilis* (at  $OD_{600}$  around 0.5). Each lysate contained 20  $\mu$ g of total protein was loaded on SDS-15% polyacrylamide gels.

A. Stained gel with Coomassie brilliant blue.

B. Western analysis using anti-His tag monoclonal antibody (GenScript).

Lanes: wt, wild-type *saiR-his<sub>6</sub>* (ORB8985); none, with the empty vector (ORB8824); C96S, C96S *saiR-his<sub>6</sub>* (ORB9047); C89S C96S, C89S C96S *saiR-his<sub>6</sub>* (ORB9064). The higher molecular-weight protein that cross-reacts with the antibody is likely a SaiR dimer caused by intermolecular disulfide bond formation.

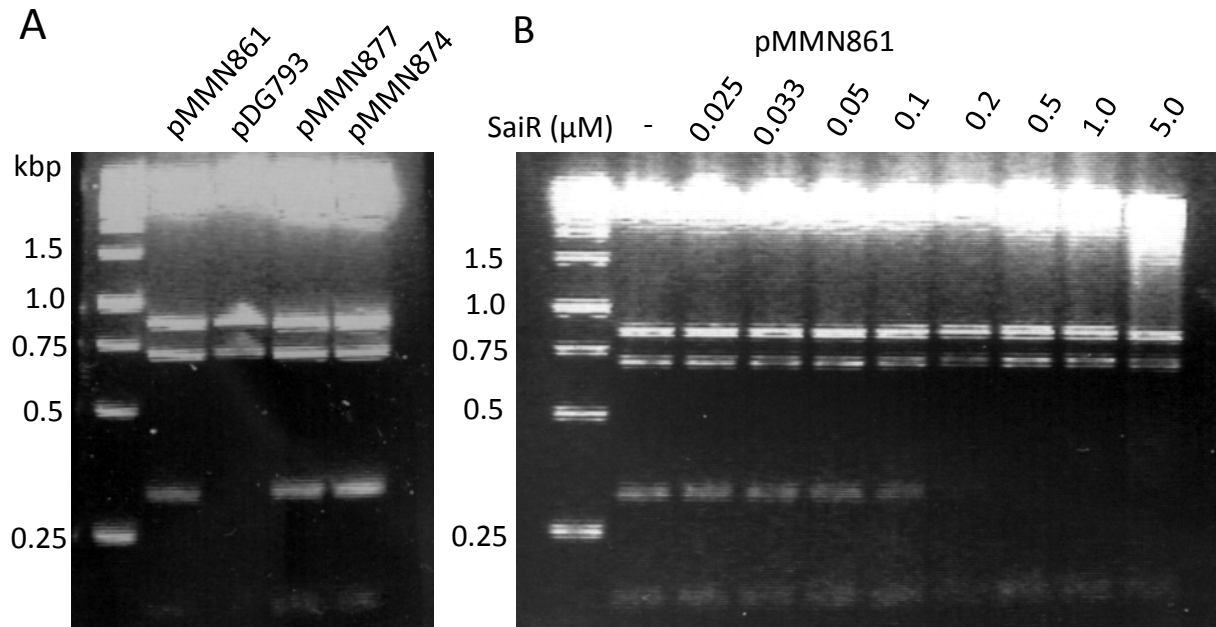

**Fig. S4.** SaiR protects *Dral* cleavage of the *spxA2* DNA but not other *Dral* recognition sites in the PDG793 vector plasmid.

A. 300 ng of each plasmid was digested with 10 units of *Dral* in 10  $\mu$ l reaction at 37°C for 1 h. After inactivation of the enzyme at 65°C for 20 min, the reaction was run on 2% agarose to separate the digested fragments. pMMN861, 874, and 877 are pDG793 carrying *spxA2*(-50/+31), *spxA2*(-50/+174), and *spxA2*(-50/+31: A-17C, G-20T) DNA.

B. pMMN861 was digested with *Dral* as described above in the absence and presence of increasing concentrations of SaiR.

|                         |   |   |   |   |   |    |    |     |     |     |
|-------------------------|---|---|---|---|---|----|----|-----|-----|-----|
| NaOCl ( $\mu\text{M}$ ) | - | - | - | 1 | 5 | 25 | 50 | 100 | 200 | 200 |
| SaiR (250 nM)           | - | - | + | + | + | +  | +  | +   | +   | -   |
| <i>Dra</i> I (0.2 unit) | - | + | + | + | + | +  | +  | +   | +   | +   |

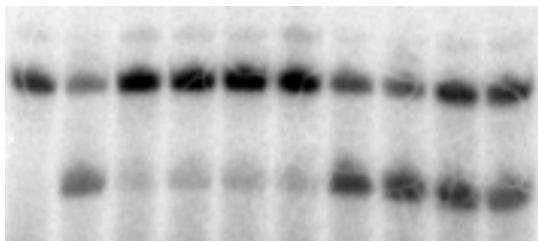

|                           |   |   |   |   |   |    |    |     |     |     |
|---------------------------|---|---|---|---|---|----|----|-----|-----|-----|
| diamide ( $\mu\text{M}$ ) | - | - | - | 1 | 5 | 25 | 50 | 100 | 200 | 200 |
| SaiR (250 nM)             | - | - | + | + | + | +  | +  | +   | +   | -   |
| <i>Dra</i> I (0.2 unit)   | - | + | + | + | + | +  | +  | +   | +   | +   |

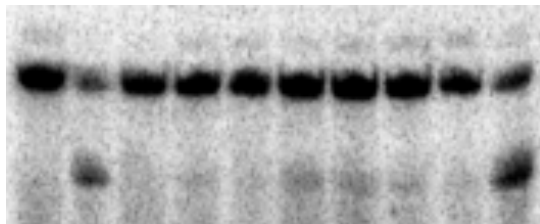

|                                                 |   |   |   |   |   |    |    |     |     |     |
|-------------------------------------------------|---|---|---|---|---|----|----|-----|-----|-----|
| H <sub>2</sub> O <sub>2</sub> ( $\mu\text{M}$ ) | - | - | - | 1 | 5 | 25 | 50 | 100 | 200 | 200 |
| SaiR (250 nM)                                   | - | - | + | + | + | +  | +  | +   | +   | -   |
| <i>Dra</i> I (0.2 unit)                         | - | + | + | + | + | +  | +  | +   | +   | +   |

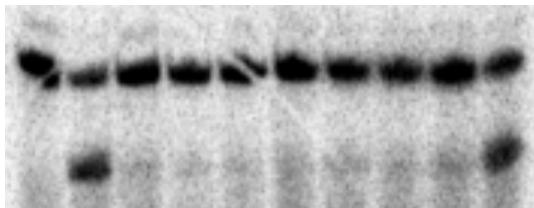

**Fig. S5A.** NaOCl affects binding of SaiR to *spxA2* DNA carrying SaiR box-1. The *Dra*I-digestion protection assay using the wild-type probe was carried out as described in Fig. 5, except that SaiR was treated with increasing concentrations of NaOCl, diamide, or H<sub>2</sub>O<sub>2</sub> at room temperature for 5 min before addition of the radioactive wild-type *spxA2* DNA probe, followed by *Dra*I digestion.

|                         |   |   |   |   |   |    |    |     |     |     |
|-------------------------|---|---|---|---|---|----|----|-----|-----|-----|
| NaOCl ( $\mu\text{M}$ ) | - | - | - | 1 | 5 | 25 | 50 | 100 | 200 | 200 |
| SaiR (250 nM)           | - | - | + | + | + | +  | +  | +   | +   | -   |
| <i>DraI</i> (0.2 unit)  | - | + | + | + | + | +  | +  | +   | +   | +   |

SaiR(C89S)

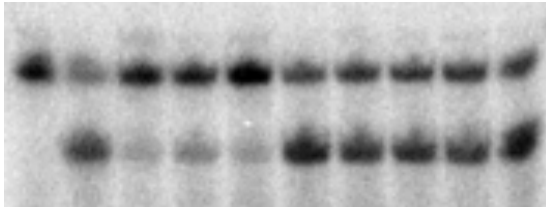

SaiR(C96S)

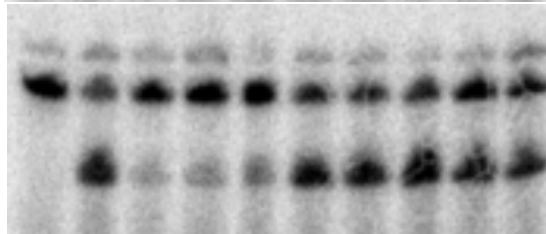

SaiR  
(C89SC96S)

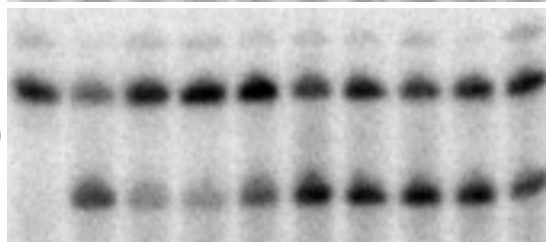

|                         |   |   |   |   |   |    |    |     |     |     |
|-------------------------|---|---|---|---|---|----|----|-----|-----|-----|
| NaOCl ( $\mu\text{M}$ ) | - | - | - | 1 | 5 | 25 | 50 | 100 | 200 | 200 |
| SaiR (250 nM)           | - | - | + | + | + | +  | +  | +   | +   | -   |
| <i>DraI</i> (0.2 unit)  | - | + | + | + | + | +  | +  | +   | +   | +   |

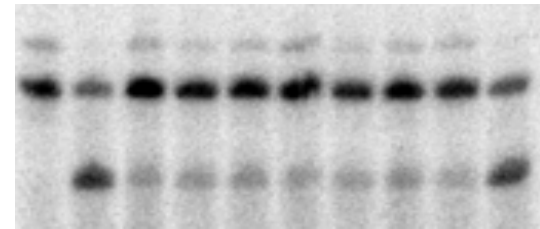

**Fig. S5C.** Preformed SaiR-DNA complex is resistant to NaOCl. The wild-type *spxA2* probe was incubated with SaiR at room temperature for 15 min and the reaction was treated with increasing concentrations of NaOCl for 5 min before *DraI* digestion.

**Fig. S5B.** SaiR proteins with cysteine substitutions respond to NaOCl. The protection assay was performed with the wild-type *spxA2* probe as described in Fig. S5A.

A

-35 TG promoter -10

TTCAAGGCACCTTCCTTGACTGTTACATTGGCCAATACATATACTCGAAAGAAAAG  
 AGAAATTTTATATAGGGGATGAATATATG

B

|                          |                         |
|--------------------------|-------------------------|
| <i>spxA2</i> SaiR site-1 | ACTGTAAGGTTTAAAATTACAGT |
| <i>spxA2</i> SaiR site-2 | ACTGTAATTTTTTTAAATACATT |
| BA0787 SaiR              | ACTGTTACATTGGCCAATACATA |
| Bc/Bt group A            | ACTGTTACATTGGCCAATACATA |
| Bc/Bt group B            | ACTGTTTCATTGGCCAATACATA |
| Bc/Bt group C            | ACTGTTGCATTGGCCAATACATA |

**Fig. S6.** A possible SaiR site is present around the core promoter of BA0787. (A) The nucleotide sequence of the promoter region of BA0787. The ATG translational start site is underlined. Putative -10 and -35 elements are underlined and possible TG (extended) promoter is marked. (B) Comparison of the possible SaiR-binding site in BA0787 with the two sites in the *spxA2* promoter. Conserved sequences are shown in blue. Blast search showed that *spxA2* SaiR site-1 and site-2 in *B. cereus* and *B. thuringiensis* have perfect matches with those in *B. anthracis*. The regions corresponding to BA0787 are classified into three groups. Four *B. cereus* and one *B. thuringiensis* strains belong to group A, six *B. cereus* and four *B. thuringiensis* strains belong to group B, and two *B. cereus* and three *B. thuringiensis* strains belong to group C.



Table S1 Strains used in the study

| Strain                           | Relevant genotype                                                              | Construction                           |
|----------------------------------|--------------------------------------------------------------------------------|----------------------------------------|
| <b><i>B. anthracis</i></b>       |                                                                                |                                        |
| 7702                             | Sterne                                                                         | (Cataldi <i>et al.</i> , 1990)         |
| 7702 SR1                         | streptomycin resistant                                                         | (Barendt <i>et al.</i> , 2013)         |
| ORB8170                          | $\Delta spxA1$                                                                 | (Barendt <i>et al.</i> , 2013)         |
| ORB8285                          | $\Delta spxA1 \Delta spxA2$                                                    | (Barendt <i>et al.</i> , 2013)         |
| ORB8398                          | $\Delta spxA1$ streptomycin resistant                                          | (Barendt <i>et al.</i> , 2013)         |
| ORB8404                          | $\Delta spxA1$ ICEBs1-Pspank(hy)-spxA1DD streptomycin resistant                | (Barendt <i>et al.</i> , 2013)         |
| ORB8438                          | $\Delta spxA2$                                                                 | (Barendt <i>et al.</i> , 2013)         |
| ORB8476                          | $\Delta spxA1$ saiR(C95A) cya(G2265T)                                          | spxA1 suppressor                       |
| ORB8477                          | $\Delta spxA1$ saiR(T83A)                                                      | spxA1 suppressor                       |
| ORB8478                          | $\Delta spxA1$ saiR(C86T) BAS3859 (C2237T)                                     | spxA1 suppressor                       |
| ORB8479                          | $\Delta spxA1$ saiR(G179T)                                                     | spxA1 suppressor                       |
| ORB8480                          | $\Delta spxA1$ saiR(G221A)                                                     | spxA1 suppressor                       |
| ORB8492                          | $\Delta spxA1$ saiR( $\Delta$ T144)                                            | spxA1 suppressor                       |
| ORB8493                          | $\Delta spxA1$ saiR(+T145)                                                     | spxA1 suppressor                       |
| ORB8494                          | $\Delta spxA1$ saiR(G32A)                                                      | spxA1 suppressor                       |
| ORB8495                          | $\Delta spxA1$ saiR( $\Delta$ ACCCA104-108)                                    | spxA1 suppressor                       |
| ORB8496                          | $\Delta spxA1$ saiR( $\Delta$ T201 $\Delta$ 204)                               | spxA1 suppressor                       |
| ORB8497                          | $\Delta spxA1$ saiR(G181A)                                                     | spxA1 suppressor                       |
| ORB8564                          | $\Delta spxA1 \Delta spxA2 \Delta saiR$                                        | pMMN839 ( $\Delta saiR$ ) x ORB8285    |
| ORB8571                          | $\Delta saiR$                                                                  | pMMN839 ( $\Delta saiR$ ) x 7702       |
| ORB8606                          | $\Delta spxA1 \Delta saiR$                                                     | pMMN839 ( $\Delta saiR$ ) x ORB8170    |
| ORB8611                          | $\Delta spxA1 \Delta saiR$ streptomycin resistant                              | Spontaneous isolate from ORB8606       |
| ORB8723                          | $\Delta spxA1 \Delta saiR$ ICEBs1-Pspank(hy)-saiR(C89S) streptomycin resistant | ICEBs1::pMMN851 [saiR(C89S)] x ORB8611 |
| ORB8724                          | $\Delta spxA1 \Delta saiR$ ICEBs1-Pspank(hy)-saiR(C96S) streptomycin resistant | ICEBs1::pMMN852 [saiR(C96S)] x ORB8611 |
| ORB8725                          | $\Delta spxA1 \Delta saiR$ ICEBs1-Pspank(hy)-saiR(wt) streptomycin resistant   | ICEBs1::pMMN850 [saiR(wt)] x ORB8611   |
| <b><i>B. subtilis</i></b>        |                                                                                |                                        |
| <b>JH642 and its derivatives</b> |                                                                                |                                        |
| JH642                            | parent                                                                         | James Hoch                             |
| JMA475                           | cgeD::Pspank(hy)-rapI                                                          | (Auchtung <i>et al.</i> , 2005)        |
| ORB8713                          | ICEBs1-Pspank(hy)-saiR(C89S)                                                   | pMMN851 x JH642                        |
| ORB8714                          | ICEBs1-Pspank(hy)-saiR(C96S)                                                   | pMMN852 x JH642                        |
| ORB8715                          | ICEBs1-Pspank(hy)-saiR(wt)                                                     | pMMN850 x JH642                        |
| ORB8718                          | cgeD::Pspank(hy)-rapI ICEBs1-Pspankhy-saiR(C89S)                               | JMA475 x ORB8713                       |
| ORB8719                          | cgeD::Pspank(hy)-rapI ICEBs1-Pspankhy-saiR(C96S)                               | JMA475 x ORB8714                       |
| ORB8720                          | cgeD::Pspank(hy)-rapI ICEBs1-Pspankhy-saiR(wt)                                 | JMA475 x ORB8715                       |
| <b>168 and its derivatives</b>   |                                                                                |                                        |
| 168                              | parent                                                                         | (Kunst <i>et al.</i> , 1997)           |

|         |                                                                                    |                   |
|---------|------------------------------------------------------------------------------------|-------------------|
| ORB8812 | <i>amyE::Pspank(hy)-saiR</i>                                                       | pSS9 x 168        |
| ORB8820 | <i>thrC::spxA2(-247/+268)-lacZ amyE::Pspank(hy)-saiR</i>                           | ORB8605 x ORB8812 |
| ORB8821 | <i>amyE::pDR111</i>                                                                | pDR111 x 168      |
| ORB8822 | <i>amyE::Pspank(hy)-saiR(C89S)</i>                                                 | pSS10 x 168       |
| ORB8823 | <i>amyE::Pspank(hy)-saiR(C96S)</i>                                                 | pSS11 x 168       |
| ORB8824 | <i>thrC::spxA2(-247/+268)-lacZ amyE::pDR111</i>                                    | ORB8605 x ORB8821 |
| ORB8825 | <i>thrC::spxA2(-247/+268)-lacZ amyE::Pspank(hy)-saiR(C89S)</i>                     | ORB8605 x ORB8822 |
| ORB8826 | <i>thrC::spxA2(-247/+268)-lacZ amyE::Pspank(hy)-saiR(C96S)</i>                     | ORB8605 x ORB8823 |
| ORB8835 | <i>thrC::spxA2(-50/+31)-lacZ</i>                                                   | pMMN861 x 168     |
| ORB8839 | <i>thrC::spxA2(-50/+31)-lacZ amyE::Pspank(hy)-saiR</i>                             | pMMN861 x ORB8812 |
| ORB8845 | <i>thrC::trxB-lacZ</i>                                                             | ORB6824 x 168     |
| ORB8846 | <i>thrC::trxB-lacZ amyE::Pspank(hy)-saiR</i>                                       | ORB6824 x ORB8812 |
| ORB8855 | <i>thrC::spxA2(-100/+31)-lacZ</i>                                                  | pMMN865 x 168     |
| ORB8859 | <i>thrC::spxA2(-100/+31)-lacZ amyE::Pspank(hy)-saiR</i>                            | pMMN865 x ORB8812 |
| ORB8863 | <i>thrC::spxA2(-50/+4)-lacZ</i>                                                    | pMMN869 x 168     |
| ORB8864 | <i>thrC::spxA2(-38/+31)-lacZ</i>                                                   | pMMN870 x 168     |
| ORB8865 | <i>thrC::spxA2(-50/+4)-lacZ amyE::Pspank(hy)-saiR</i>                              | pMMN869 x ORB8812 |
| ORB8866 | <i>thrC::spxA2(-35/+31)-lacZ amyE::Pspank(hy)-saiR</i>                             | pMMN870 x ORB8812 |
| ORB8884 | <i>thrC::spxA2(-247/+268)-lacZ</i>                                                 | pSB20 x 168       |
| ORB8889 | <i>thrC::spxA2(-100/-39)-lacZ</i>                                                  | pMMN871 x 168     |
| ORB8890 | <i>thrC::spxA2(-100/-39)-lacZ amyE::Pspank(hy)-saiR</i>                            | pMMN871 x ORB8812 |
| ORB8900 | <i>thrC::spxA2(-100/+268)-lacZ</i>                                                 | pMMN872 x 168     |
| ORB8901 | <i>thrC::spxA2(-247/+31)-lacZ</i>                                                  | pMMN873 x 168     |
| ORB8902 | <i>thrC::spxA2(-100/+268)-lacZ amyE::Pspank(hy)-saiR</i>                           | pMMN872 x ORB8812 |
| ORB8903 | <i>thrC::spxA2(-247/+31)-lacZ amyE::Pspank(hy)-saiR</i>                            | pMMN873 x ORB8812 |
| ORB8910 | <i>thrC::spxA2(-50/+174)-lacZ</i>                                                  | pMMN874 x 168     |
| ORB8911 | <i>thrC::spxA2(-50/+174)-lacZ amyE::Pspank(hy)-saiR</i>                            | pMMN874 x ORB8812 |
| ORB8922 | <i>thrC::spxA2(-50/+174:T160G)-lacZ</i>                                            | pMMN875 x 168     |
| ORB8923 | <i>thrC::spxA2(-50/+174:G142T, A145C)-lacZ</i>                                     | pMMN876 x 168     |
| ORB8924 | <i>thrC::spxA2(-50/+174:T160G)-lacZ amyE::Pspank(hy)-saiR</i>                      | pMMN875 x ORB8812 |
| ORB8827 | <i>thrC::spxA2(-247/+268)-lacZ amyE::pDR111</i>                                    | ORB8821 x ORB8605 |
| ORB8925 | <i>thrC::spxA2(-50/+174:G142T, A145C)-lacZ amyE::Pspank(hy)-saiR</i>               | pMMN876 x ORB8812 |
| ORB8930 | <i>thrC::spxA2(-50/+31:A-17C, G-20T)-lacZ</i>                                      | pMMN877 x 168     |
| ORB8931 | <i>thrC::spxA2(-50/+174:A-17C, G-20T)-lacZ</i>                                     | pMMN878 x 168     |
| ORB8932 | <i>thrC::spxA2(-50/+31:A-17C, G-20T)-lacZ amyE::Pspank(hy)-saiR</i>                | pMMN877 x ORB8812 |
| ORB8933 | <i>thrC::spxA2(-50/+174:A-17C, G-20T)-lacZ amyE::Pspank(hy)-saiR</i>               | pMMN878 x ORB8812 |
| ORB8945 | <i>thrC::spxA2(-50/+174:A-17C, G-20T, G142T, A145C)-lacZ</i>                       | pMMN879 x 168     |
| ORB8946 | <i>thrC::spxA2(-50/+174:A-17C, G-20T, G142T, A145C)-lacZ amyE::Pspank(hy)-saiR</i> | pMMN879 x ORB8812 |
| ORB8985 | <i>thrC::spxA2(-247/+268)-lacZ amyE::Pspank(hy)-saiRhis6</i>                       | pMMN880 x ORB8884 |
| ORB9046 | <i>thrC::spxA2(-247/+268)-lacZ spx::neo</i>                                        | ORB3834 x ORB8884 |
| ORB9047 | <i>thrC::spxA2(-247/+268)-lacZ amyE::Pspank(hy)-saiR(C96S)his6</i>                 | pYA1 x ORB8884    |

|         |                                                                          |                  |
|---------|--------------------------------------------------------------------------|------------------|
| ORB9049 | <i>thrC::spxA2(-247/+268)-lacZ spx::neo amyE::pDR111</i>                 | pDR111 x ORB9046 |
| ORB9050 | <i>thrC::spxA2(-247/+268)-lacZ amyE::Pspank(hy)-saiR spx::neo</i>        | pSS9 x ORB9046   |
| ORB9055 | <i>thrC::spxA2(-247/+268)-lacZ amyE::Pspank(hy)-saiR(C89S C96S)</i>      | pYA2 x ORB8884   |
| ORB9064 | <i>thrC::spxA2(-247/+268)-lacZ amyE::Pspank(hy)-saiR(C89S C96S) his6</i> | pYA3 x ORB8884   |

---

## References

- Auchtung, J.M., Lee, C.A., Monson, R.E., Lehman, A.P., and Grossman, A.D. (2005) Regulation of a *Bacillus subtilis* mobile genetic element by intercellular signaling and the global DNA damage response. *Proc Natl Acad Sci USA* **102**: 12554-12559.
- Barendt, S., Lee, H., Birch, C., Nakano, M.M., Jones, M., and Zuber, P. (2013) Transcriptomic and phenotypic analysis of paralogous *spx* gene function in *Bacillus anthracis* Sterne. *MicrobiologyOpen* **2**: 695-714.
- Cataldi, A., Labruyere, E., and Mock, M. (1990) Construction and characterization of a protective antigen-deficient *Bacillus anthracis* strain. *Mol Microbiol* **4**: 1111-1117.
- Kunst, F., Ogasawara, N., Moszer, I., Albertini, A.M., Alloni, G., Azevedo, V., et al. (1997) The complete genome sequence of the Gram-positive bacterium *Bacillus subtilis*. *Nature* **390**: 249-256.

Table S2. Plasmids used in this study

| Plasmid name | Feature                                                                           | Source                                |
|--------------|-----------------------------------------------------------------------------------|---------------------------------------|
| pDG793       | <i>thrC</i> integration vector carrying promoter-less <i>lacZ</i>                 | (Guérout-Fleury <i>et al.</i> , 1996) |
| pDR111       | <i>amyE</i> integration vector carrying IPTG-inducible <i>Pspank(hy)</i> promoter | (Britton <i>et al.</i> , 2002)        |
| pET23a       | expression vector for C-terminal 6xHis-tagged protein                             | Novagen                               |
| pJMA402      | cloning vector for ICEBs1 conjugation                                             | A. D. Grossman                        |
| pRP1028      | Plasmid for allelic exchange in <i>B. anthracis</i>                               | S. Stibitz                            |
| pMMN839      | pRP1028 carrying $\Delta$ <i>saiR</i>                                             | this study                            |
| pMMN850      | pJMA402 carrying <i>saiR</i> (wt)                                                 | this study                            |
| pMMN851      | pJMA402 carrying <i>saiR</i> (C89S)                                               | this study                            |
| pMMN852      | pJMA402 carrying <i>saiR</i> (C96S)                                               | this study                            |
| pMMN856      | pET23a carrying <i>saiR</i> (wt) <i>his</i> <sub>6</sub>                          | this study                            |
| pMMN857      | pET23a carrying <i>saiR</i> (C89S) <i>his</i> <sub>6</sub>                        | this study                            |
| pMMN858      | pET23a carrying <i>saiR</i> (C96S) <i>his</i> <sub>6</sub>                        | this study                            |
| pMMN881      | pET23a carrying <i>saiR</i> (C89S C96S) <i>his</i> <sub>6</sub>                   | this study                            |
| pMMN861      | pDG793 carrying <i>spxA2</i> (-50/+31) promoter                                   | this study                            |
| pMMN865      | pDG793 carrying <i>spxA2</i> (-100/+31) promoter                                  | this study                            |
| pMMN869      | pDG793 carrying <i>spxA2</i> (-50/+4) promoter                                    | this study                            |
| pMMN870      | pDG793 carrying <i>spxA2</i> (-38/+31) promoter                                   | this study                            |
| pMMN871      | pDG793 carrying <i>spxA2</i> (-100/-39) promoter                                  | this study                            |
| pMMN872      | pDG793 carrying <i>spxA2</i> (-100/+268) promoter                                 | this study                            |
| pMMN873      | pDG793 carrying <i>spxA2</i> (-247/+31) promoter                                  | this study                            |
| pMMN874      | pDG793 carrying <i>spxA2</i> (-50/+174) promoter                                  | this study                            |
| pMMN875      | pDG793 carrying <i>spxA2</i> (-50/+174:T190G) promoter                            | this study                            |
| pMMN876      | pDG793 carrying <i>spxA2</i> (-50/+174:G142T, A145C) promoter                     | this study                            |
| pMMN877      | pDG793 carrying <i>spxA2</i> (-50/+31: A-17C, G-20T) promoter                     | this study                            |
| pMMN878      | pDG793 carrying <i>spxA2</i> (-50/+174:A-17C, G-20T) promoter                     | this study                            |
| pMMN879      | pDG793 carrying <i>spxA2</i> (-50/+174:A-17C, G-20T, G142T, A145C) promoter       | this study                            |
| pMMN880      | pDR111 carrying <i>saiRhis</i> <sub>6</sub>                                       | this study                            |
| pSB20        | pDG793 carrying <i>spxA2</i> (-247/+268) promoter                                 | this study                            |
| pSS9         | pDR111 carrying <i>saiR</i> (wt)                                                  | this study                            |
| pSS10        | pDR111 carrying <i>saiR</i> (C89S)                                                | this study                            |
| pSS11        | pDR111 carrying <i>saiR</i> (C96S)                                                | this study                            |
| pYA1         | pDR111 carrying <i>saiR</i> (C96S) <i>his</i> <sub>6</sub>                        | this study                            |
| pYA2         | pDR111 carrying <i>saiR</i> (C89S C96S)                                           | this study                            |
| pYA3         | pDR111 carrying <i>saiR</i> (C89S C96S) <i>his</i> <sub>6</sub>                   | this study                            |

## References

Britton, R.A., Eichenberger, P., Gonzalez-Pastor, J.E., Fawcett, P., Monson, R., Losick, R., and Grossman, A.D. (2002) Genome-wide analysis of the stationary-phase sigma factor ( $\sigma^H$ ) regulon of *Bacillus subtilis*. *J Bacteriol* **184**: 4881-4890.

Guérout-Fleury, A.M., Frandsen, N., and Stragier, P. (1996) Plasmids for ectopic integration in *Bacillus subtilis*. *Gene* **180**: 57-61.

Table S3 oligonucleotides used in this study

| Primer    | Sequence (5' to 3')*                           | Usage                                                                                |
|-----------|------------------------------------------------|--------------------------------------------------------------------------------------|
| oMN13-588 | GCTAACCTATCTGTAATATTTATGGCTA                   | sequence for BAS3200                                                                 |
| oMN13-589 | GTATTTCCATTACATTTCAATAGTAAGA                   | sequence for BAS3200                                                                 |
| oMN13-590 | TTCTTGATTGATAAGCAAAGTAAAGTCGCTGCTCATTGT        | construction of $\Delta$ BAS3200                                                     |
| oMN13-591 | CGACTTTACTTTGCTTATCAATCAAGAACGTTAAGCGGCT       | construction of $\Delta$ BAS3200                                                     |
| oMN13-592 | gcaggatccACGTAGCGTTCGAACATTTTTAAA              | construction of $\Delta$ BAS3200                                                     |
| oMN13-593 | ggaatgcatACAATTGTTATCAGAGGTGTGCA               | construction of $\Delta$ BAS3200                                                     |
| oMN13-620 | TGCAATCGCTGTTACTCGTC                           | BA0787 RT-qPCR                                                                       |
| oMN13-621 | CGCTTGAGTGCAGGTTGAA                            | BA0787 RT-qPCR                                                                       |
| oMN13-627 | GTTActcgagACGTTCTTGATTGATAAGAT                 | construction of pMMN856, 857, 858, and 881                                           |
| oMN13-638 | TATCGTTTGTGAAATGTATTAATAAAA                    | construction of pMMN874 and 878                                                      |
| oMN13-640 | gaccgaattccAAGACTTAACATTTGATTAAT               | construction of oMMN861, 869, 874, 875, 876, and 877                                 |
| oMN13-641 | attggatccAGATGATGACAACCTCACTTCTT               | construction of pMMN861, 865, 870, and 873                                           |
| oMN13-647 | gactgaattcATTTGATTAATAGAAGTAAAGGT              | construction of pMMN870                                                              |
| oMN13-648 | gaaggatccTACTGTAAATTTAAACCTTACA                | construction of pMMN869                                                              |
| oMN13-649 | gaatgaattcAATTGGTCAGCATAACACTATGGG             | construction of pMMN871 and 872                                                      |
| oMN13-652 | gaaggatccTTAAGTCTGGATTAATTAATCAT               | construction of pMMN871                                                              |
| oMN14-659 | gaccgaattccAAGACTTAACATTTGATTAATAGAAGTAAAGTTTA | construction of pMMN877, 878, and 879                                                |
| oMN14-660 | TATCGTTTGTGAACTGTATTAATAAAA                    | construction of pMMN875, 876, and 879                                                |
| oMN14-661 | TATCGTTTGTGAAATGTATTAATAAAAAAAGTAAAGTTTA       | construction of pMMN879                                                              |
| oMN14-662 | TGAAAGGAGGAAGCAGGAAA                           | BA3454 RT-qPCR                                                                       |
| oMN14-663 | AAAGACTCCATTGTTTCTCACTTG                       | BA3454 RT-qPCR                                                                       |
| oMN14-664 | gcgaagcttAGGAGGAAAACAATGAGCAGCGACTTTACTTTG     | construction of pMMN880                                                              |
| oMN14-665 | tcggcatgcTCAGTGGTGGTGGTGGTGGTCTCGAGACGTTG      | construction of pMMN880, pYA1, and 3                                                 |
| oMN14-666 | ATAGAAGTAAAGGTTTAAAATTACAGTATAGA               | construction of SaiR site 1 (wt) for restriction enzyme protection assay             |
| oMN14-667 | TCTATACTGTAATTTTAAACCTTACAGTTCTAT              | construction of SaiR site 1 (wt) for restriction enzyme protection assay             |
| oMN14-668 | ATAGAAGTAAAGGTTTAAAATTACAGTATAGA               | construction of SaiR site 1 (G-20T) for restriction enzyme protection assay          |
| oMN14-669 | TCTATACTGTAATTTTAAACCTTAAAGTTCTAT              | construction of SaiR site 1 (G-20T) for restriction enzyme protection assay          |
| oMN14-670 | ATAGAAGTAAAGGTTTAAAATTACAGTATAGA               | construction of SaiR site 1 ( $\Delta$ -12T) for restriction enzyme protection assay |
| oMN14-671 | TCTATACTGTAATTTTAAACCTTACAGTTCTAT              | construction of SaiR site 1 ( $\Delta$ -12T) for restriction enzyme protection assay |
| oMN14-674 | AAGCATGCAAAGAACCGAGT                           | <i>spxA2</i> leader RT-qPCR                                                          |
| oMN14-675 | TTTTCGACATGAAGCACAGC                           | <i>spxA2</i> leader RT-qPCR                                                          |
| oSB80     | taggggaattcCGATGTAGAACTGCACTAGAAAAG            | construction of pSB20 and pMMN873                                                    |
| oSB81     | taggcggatccCGCTTTTCGACATGAAGCACAGCTTGC         | construction of pSB20 and pMMN872                                                    |
| oSB103    | taggcctgcagAATTGGTCAGCATAACACTATGGGGAC         | construction of pMMN865                                                              |
| oSH07F    | tcgaagcttAGGAGGAAAACAATGAGCAGC                 | construction of pSS9, 10, 11, pMMN856, 857, 858, 881, and pYA2                       |
| oSH08R    | tcggcatgcTTAACGTTCTTGATTGATAAGATCAAC           | construction of pSS9, 10, 11, and pYA2                                               |
| oSH09F    | TCAAATGATCAGAGTATTGTAGGTTCA                    | construction of pSS11, pMMN881, and pYA2                                             |
| oSH010R   | TGAACCTACAATACTCTGATCATTTGA                    | construction of pSS11, pMMN881, and pYA2                                             |
| oSH11R    | ATTTGATTCTGGGCTCTTAGGCTGCAACG                  | construction of pSS10                                                                |
| oSH12F    | CGTTGCAGCCTAAGAGCCAGAATCAAAT                   | construction of pSS10                                                                |
| 793up     | TTTTAAGATAATGCACTATCAACACACTC                  | <i>in vitro</i> transcription template                                               |
| 3455F1    | AAAGGAGGAAACTGAAGGTGA                          | BA3455 RT-qPCR                                                                       |

|        |                      |                     |
|--------|----------------------|---------------------|
| 3455R1 | TCCACACCGTATCTTTGCTT | BA3455 RT-qPCR      |
| rpoBF  | GAGCCGTTTGATAACCGTGT | <i>rpoB</i> RT-qPCR |
| rpoBR  | ACCTCCATCTACCAAACG   | <i>rpoB</i> RT-qPCR |

---

\*lowercase letters show sequences to generate restriction enzyme recognition sites for cloning purpose.

Table S4. Genes regulated by the *saiR* mutation

| A. Genes upregulated both in the wild-type and <i>spxA1</i> backgrounds |                                                         |               |              |       |       |              |       |      |        |      |      |      |
|-------------------------------------------------------------------------|---------------------------------------------------------|---------------|--------------|-------|-------|--------------|-------|------|--------|------|------|------|
| Locus                                                                   | GeneN                                                   | GeneS         | 7702 vs 8571 |       |       | 8170 vs 8606 |       |      | Median | Mean |      |      |
| BA3452                                                                  | hypothetical protein                                    |               | 5.62         | 4.51  | 6.08  | 5.62         | 5.41  | 6.46 | 5.48   | 5.40 | 5.48 | 5.78 |
| BA3454                                                                  | hypothetical protein                                    |               | 4.70         | 4.91  | 7.43  | 4.91         | 5.68  | 4.51 | 4.87   | 4.21 | 4.51 | 4.53 |
| BA3455                                                                  | hypothetical protein                                    |               | 3.70         | 5.47  | 4.55  | 4.55         | 4.58  | 3.47 | 4.38   | 3.49 | 3.49 | 3.78 |
| BA3456                                                                  | transcription regulator                                 | <i>spxA2</i>  | 3.20         | 3.96  | 6.04  | 3.96         | 4.40  | 3.60 | 3.85   | 3.71 | 3.71 | 3.72 |
| BA5693                                                                  | major facilitator family transporter                    |               | 1.92         | 1.70  | 1.98  | 1.92         | 1.87  | NaN  | NaN    | NaN  |      |      |
| BA4024                                                                  | dihydroorotate dehydrogenase, electron transfer subunit | <i>pyrK</i>   | 1.85         | 1.80  | 1.99  | 1.85         | 1.88  | 2.35 | 1.81   | 1.72 | 1.81 | 1.96 |
| BA4028                                                                  | aspartate carbamoyltransferase                          | <i>pyrB</i>   | 1.82         | 1.76  | 1.62  | 1.76         | 1.73  | 3.03 | 2.32   | 3.86 | 3.03 | 3.07 |
| BA4023                                                                  | dihydroorotate oxidase                                  | <i>pyrD</i>   | 1.65         | 1.82  | 1.73  | 1.73         | 1.73  | 1.89 | 1.77   | 1.65 | 1.77 | 1.77 |
| BA4025                                                                  | carbamoyl-phosphate synthase, large subunit             | <i>carB</i>   | 1.47         | 1.62  | 1.64  | 1.62         | 1.58  | 1.93 | 1.51   | 1.97 | 1.93 | 1.80 |
| BA4021                                                                  | orotate phosphoribosyltransferase                       | <i>pyrE</i>   | 1.61         | 1.57  | 1.56  | 1.57         | 1.58  | 1.82 | 1.71   | 1.91 | 1.82 | 1.81 |
| BA4027                                                                  | dihydroorotase                                          | <i>pyrC</i>   | 1.51         | 1.65  | 1.52  | 1.52         | 1.56  | 2.62 | 2.38   | 2.25 | 2.38 | 2.42 |
| BA4022                                                                  | orotidine 5-phosphate decarboxylase                     | <i>pyrF</i>   | 1.33         | 1.47  | 1.59  | 1.47         | 1.46  | 1.47 | 0.87   | 1.24 | 1.24 | 1.19 |
| BA4026                                                                  | carbamoyl-phosphate synthase, small subunit             | <i>carA</i>   | 1.64         | 1.39  | 1.36  | 1.39         | 1.46  | 2.00 | 1.97   | 1.77 | 1.97 | 1.91 |
| BA0871                                                                  | LPXTG-motif cell wall anchor domain protein             |               | 1.52         | 1.33  | 1.25  | 1.33         | 1.37  | 1.30 | 0.97   | 1.49 | 1.30 | 1.25 |
| BA3406                                                                  | ABC transporter, ATP-binding protein                    |               | 1.16         | 1.46  | 1.28  | 1.28         | 1.30  | NaN  | NaN    | NaN  |      |      |
| BA4029                                                                  | uracil permease                                         | <i>uraA</i>   | 1.16         | 1.23  | 1.24  | 1.23         | 1.21  | 1.45 | 2.56   | 1.44 | 1.45 | 1.81 |
| BA5475                                                                  | nucleoside transporter, NupC family                     |               | 0.89         | 1.09  | 1.25  | 1.09         | 1.08  | 0.17 | 0.23   | 0.34 | 0.23 | 0.25 |
| BA0610                                                                  | L-lactate permease                                      | <i>lldP-1</i> | 1.21         | 0.97  | 1.00  | 1.00         | 1.06  | 1.42 | 1.23   | 1.10 | 1.23 | 1.25 |
| B. Genes upregulated only in the <i>spxA1</i> background                |                                                         |               |              |       |       |              |       |      |        |      |      |      |
| Locus                                                                   | GeneN                                                   | GeneS         | 8170 vs 8606 |       |       | Median       | Mean  |      |        |      |      |      |
| BA0885                                                                  | S-layer protein Sap                                     | <i>sap</i>    | 4.54         | 4.63  | 4.51  | 4.54         | 4.56  |      |        |      |      |      |
| BA0887                                                                  | S-layer protein EA1                                     | <i>eag</i>    | 4.82         | 3.34  | 3.83  | 3.83         | 4.00  |      |        |      |      |      |
| BA0787                                                                  | major facilitator family transporter                    |               | 3.79         | 2.05  | 3.95  | 3.79         | 3.27  |      |        |      |      |      |
| BA0800                                                                  | ABC transporter, permease protein, putative             |               | 4.80         | 2.79  | 3.38  | 3.38         | 3.66  |      |        |      |      |      |
| BA0956                                                                  | hypothetical protein                                    |               | 2.46         | 1.18  | 2.02  | 2.02         | 1.88  |      |        |      |      |      |
| BA3524                                                                  | conserved hypothetical protein                          |               | 1.57         | 1.90  | 2.06  | 1.90         | 1.84  |      |        |      |      |      |
| BA0556                                                                  | conserved hypothetical protein                          |               | 1.48         | 1.85  | 1.98  | 1.85         | 1.77  |      |        |      |      |      |
| BA0535                                                                  | potassium channel protein, putative                     |               | 2.03         | 1.66  | NaN   | 1.84         | 1.84  |      |        |      |      |      |
| BA3438                                                                  | alcohol dehydrogenase, zinc-containing                  |               | 3.50         | 1.77  | 1.83  | 1.83         | 2.36  |      |        |      |      |      |
| BA2029                                                                  | hypothetical protein                                    |               | 1.80         | 1.50  | 2.11  | 1.80         | 1.81  |      |        |      |      |      |
| BA2390                                                                  | ABC transporter, permease protein, putative             |               | 2.96         | 1.50  | 1.78  | 1.78         | 2.08  |      |        |      |      |      |
| BA0918                                                                  | hypothetical protein                                    |               | 0.70         | 2.19  | 1.75  | 1.75         | 1.55  |      |        |      |      |      |
| BA4875                                                                  | universal stress protein family                         |               | 1.72         | 1.92  | 1.30  | 1.72         | 1.65  |      |        |      |      |      |
| BA2289                                                                  | aldehyde dehydrogenase family protein                   |               | 1.69         | 1.65  | 1.64  | 1.65         | 1.66  |      |        |      |      |      |
| BA1317                                                                  | ykgG family protein                                     |               | 1.60         | 1.64  | 1.64  | 1.64         | 1.63  |      |        |      |      |      |
| BA1316                                                                  | iron-sulfur cluster-binding protein                     |               | 1.68         | 1.63  | 1.55  | 1.63         | 1.62  |      |        |      |      |      |
| BA3465                                                                  | metallo-beta-lactamase family protein                   |               | 1.55         | 1.62  | 2.04  | 1.62         | 1.74  |      |        |      |      |      |
| BA4668                                                                  | ABC transporter, permease protein                       |               | 1.61         | 1.53  | 1.79  | 1.61         | 1.64  |      |        |      |      |      |
| BA1951                                                                  | conserved hypothetical protein                          |               | 1.63         | 1.40  | 1.58  | 1.58         | 1.54  |      |        |      |      |      |
| BA1127                                                                  | S-layer protein, putative                               |               | 1.46         | 1.53  | 1.54  | 1.53         | 1.51  |      |        |      |      |      |
| BA3324                                                                  | RNA polymerase sigma-70 factor, ECF subfamily           |               | 1.50         | 1.48  | 1.52  | 1.50         | 1.50  |      |        |      |      |      |
| BA3322                                                                  | conserved domain protein                                |               | 1.46         | 1.36  | 1.48  | 1.46         | 1.43  |      |        |      |      |      |
| BA3466                                                                  | conserved hypothetical protein                          |               | NaN          | 1.09  | 1.81  | 1.45         | 1.45  |      |        |      |      |      |
| BA2389                                                                  | ABC transporter, ATP-binding protein                    |               | 1.57         | 1.40  | 1.32  | 1.40         | 1.43  |      |        |      |      |      |
| BA3655                                                                  | oxidoreductase, Gfo/Idh/MocA family                     |               | 1.30         | 1.45  | 1.22  | 1.30         | 1.32  |      |        |      |      |      |
| BA3529                                                                  | hypothetical protein                                    |               | 1.19         | 1.29  | 1.43  | 1.29         | 1.30  |      |        |      |      |      |
| BA0196                                                                  | oxidoreductase, aldo/keto reductase family              |               | 1.30         | 1.16  | 1.28  | 1.28         | 1.25  |      |        |      |      |      |
| BA4669                                                                  | ABC transporter, ATP-binding protein                    |               | 1.24         | 1.23  | 0.87  | 1.23         | 1.12  |      |        |      |      |      |
| BA4935                                                                  | hypothetical protein                                    |               | 1.13         | 1.19  | 1.23  | 1.19         | 1.18  |      |        |      |      |      |
| BA5648                                                                  | uracil-DNA glycosylase                                  | <i>ung</i>    | NaN          | 1.08  | 1.28  | 1.18         | 1.18  |      |        |      |      |      |
| BA2902                                                                  | CAAX amino terminal protease family protein             |               | 1.40         | 1.16  | 1.17  | 1.17         | 1.24  |      |        |      |      |      |
| BA3433                                                                  | glucose-6-phosphate 1-dehydrogenase                     | <i>zwf</i>    | 1.14         | 1.16  | 1.48  | 1.16         | 1.26  |      |        |      |      |      |
| BA3525                                                                  | conserved hypothetical protein                          |               | 0.78         | 1.19  | 1.15  | 1.15         | 1.04  |      |        |      |      |      |
| BA2269                                                                  | membrane protein, putative                              |               | 1.66         | 0.90  | 1.14  | 1.14         | 1.23  |      |        |      |      |      |
| BA0197                                                                  | pyrroline-5-carboxylate reductase, putative             |               | 1.22         | 1.05  | 1.13  | 1.13         | 1.13  |      |        |      |      |      |
| BA3323                                                                  | conserved hypothetical protein                          |               | 1.11         | 1.12  | 1.09  | 1.11         | 1.11  |      |        |      |      |      |
| BA3947                                                                  | tRNA pseudouridine synthase B                           | <i>truB</i>   | 1.14         | 1.09  | 0.92  | 1.09         | 1.05  |      |        |      |      |      |
| BA5238                                                                  | PAP2 family protein                                     |               | 2.25         | 1.16  | 1.01  | 1.07         | 1.47  |      |        |      |      |      |
| BA1122                                                                  | hypothetical protein                                    |               | 1.06         | 1.37  | 1.03  | 1.06         | 1.16  |      |        |      |      |      |
| C. Genes downregulated more in the <i>spxA1</i> background              |                                                         |               |              |       |       |              |       |      |        |      |      |      |
| Locus                                                                   | GeneN                                                   | GeneS         | 7702 vs 8571 |       |       | Median       | Mean  |      |        |      |      |      |
| BA5072                                                                  | hypothetical protein                                    |               | -2.79        | -2.75 | -2.40 | -2.75        | -2.64 |      |        |      |      |      |
| BXA0072                                                                 | hypothetical protein                                    |               | -2.61        | -2.33 | -2.40 | -2.40        | -2.45 |      |        |      |      |      |
| BA4370                                                                  | hypothetical protein                                    |               | -2.16        | -2.00 | -2.04 | -2.04        | -2.07 |      |        |      |      |      |
| BA0422                                                                  | conserved hypothetical protein                          |               | -2.00        | -1.89 | -2.19 | -2.00        | -2.03 |      |        |      |      |      |
| BA4490                                                                  | ribosomal protein L33                                   | <i>rpmG-2</i> | -1.89        | -2.35 | -2.00 | -2.00        | -2.08 |      |        |      |      |      |
| BA2666                                                                  | hypothetical protein                                    |               | -1.99        | -1.91 | -1.94 | -1.94        | -1.94 |      |        |      |      |      |



|         |                                                          |               |       |       |       |       |       |
|---------|----------------------------------------------------------|---------------|-------|-------|-------|-------|-------|
| BA1182  | conserved hypothetical protein                           |               | -2.09 | -1.88 | -1.89 | -1.89 | -1.95 |
| BA1284  | hypothetical protein                                     |               | -1.86 | -1.80 | -1.95 | -1.86 | -1.87 |
| BA1741  | hypothetical protein                                     |               | -1.77 | -1.83 | -1.72 | -1.77 | -1.77 |
| BA0034  | transition state transcriptional regulatory protein AbrB | <i>abrB</i>   | -1.83 | -1.76 | -1.72 | -1.76 | -1.77 |
| BA3752  | conserved hypothetical protein                           |               | -1.61 | -1.75 | -1.79 | -1.75 | -1.72 |
| BA1137  | hypothetical protein                                     |               | -1.37 | -1.74 | -1.77 | -1.74 | -1.62 |
| BA3426  | conserved hypothetical protein                           |               | -1.72 | -1.72 | -2.14 | -1.72 | -1.86 |
| BA4617  | hypothetical protein                                     |               | -1.66 | -1.69 | -1.69 | -1.69 | -1.68 |
| BA0406  | conserved hypothetical protein                           |               | -1.77 | -1.51 | -1.66 | -1.66 | -1.65 |
| BA5626  | 4-oxalocrotonate tautomerase                             |               | -1.81 | -1.59 | -1.65 | -1.65 | -1.68 |
| BA4473  | conserved domain protein                                 |               | -1.83 | -1.62 | -1.60 | -1.62 | -1.68 |
| BA3860  | copper-ion-binding protein                               |               | -1.38 | -1.56 | -1.72 | -1.56 | -1.55 |
| BA1363  | conserved domain protein                                 |               | -1.95 | -1.49 | -1.51 | -1.51 | -1.65 |
| BA2262  | heat shock protein, Hsp20 family                         |               | -1.59 | -1.45 | -1.40 | -1.45 | -1.48 |
| BA2282  | lemA domain protein                                      |               | -1.40 | -1.43 | -1.65 | -1.43 | -1.49 |
| BA1461  | conserved domain protein                                 |               | -1.45 | -1.36 | -1.42 | -1.42 | -1.41 |
| BA1607  | conserved hypothetical protein                           |               | -1.30 | -1.43 | -1.40 | -1.40 | -1.38 |
| BA3411  | conserved hypothetical protein                           |               | -1.46 | -1.40 | -1.38 | -1.40 | -1.41 |
| BA4779  | conserved hypothetical protein                           |               | -1.34 | -1.39 | -1.42 | -1.39 | -1.38 |
| BA1247  | hypothetical protein                                     |               | -1.66 | -1.34 | -1.38 | -1.38 | -1.46 |
| BA1579  | conserved hypothetical protein                           |               | -1.23 | -1.38 | -1.37 | -1.37 | -1.33 |
| BA4163  | conserved hypothetical protein                           |               | -1.37 | -1.35 | -1.54 | -1.37 | -1.42 |
| BA1897  | conserved hypothetical protein                           |               | -1.48 | -1.31 | -1.37 | -1.37 | -1.39 |
| BA2166  | hypothetical protein                                     |               | -1.55 | -0.81 | -1.36 | -1.36 | -1.24 |
| BA2363  | transcriptional regulator, ArsR family                   |               | -1.33 | -1.28 | -1.32 | -1.32 | -1.31 |
| BA4109  | prophage LambdaBa02, fosfomycin resistance protein       | <i>fosB-2</i> | -1.44 | -1.31 | -1.14 | -1.31 | -1.30 |
| BA5738  | ribosomal protein L34                                    | <i>rpmH</i>   | -1.37 | -1.25 | -1.31 | -1.31 | -1.31 |
| BA0851  | hypothetical protein                                     |               | -1.39 | -1.23 | -1.30 | -1.30 | -1.31 |
| BA4265  | hypothetical protein                                     |               | -1.20 | -1.29 | -2.01 | -1.29 | -1.50 |
| BA3713  | hut operon transcriptional activator                     | <i>hutP</i>   | -1.13 | -1.37 | -1.29 | -1.29 | -1.27 |
| BA4550  | conserved hypothetical protein                           |               | -1.19 | -1.36 | -1.28 | -1.28 | -1.28 |
| BA4329  | conserved hypothetical protein                           |               | -1.57 | -1.28 | -1.23 | -1.28 | -1.36 |
| BA1621  | hypothetical protein                                     |               | -1.53 | -1.20 | -1.28 | -1.28 | -1.34 |
| BA0488  | hypothetical protein                                     |               | -1.15 | -1.35 | -1.28 | -1.28 | -1.26 |
| BA0817  | hypothetical protein                                     |               | -1.14 | -1.34 | -1.26 | -1.26 | -1.25 |
| BA1135  | cold shock protein CspA                                  | <i>cspA-1</i> | -1.17 | -1.31 | -1.24 | -1.24 | -1.24 |
| BA4060  | acetyltransferase, GNAT family                           |               | -1.14 | -1.24 | -1.27 | -1.24 | -1.22 |
| BA5007  | hypothetical protein                                     |               | -1.13 | -1.39 | -1.24 | -1.24 | -1.25 |
| BA1782  | transposase, IS605 family, OrfA                          |               | -1.19 | -1.26 | -1.24 | -1.24 | -1.23 |
| BA4769  | spore coat protein C, putative                           |               | -1.25 | -1.23 | -1.19 | -1.23 | -1.22 |
| BA5255  | conserved hypothetical protein TIGR00106                 |               | -1.20 | -1.22 | -1.44 | -1.22 | -1.29 |
| BA0816  | conserved hypothetical protein                           |               | -1.12 | -1.32 | -1.22 | -1.22 | -1.22 |
| BA0775  | conserved hypothetical protein                           |               | -1.22 | -1.19 | -1.24 | -1.22 | -1.21 |
| BA4321  | conserved hypothetical protein                           |               | -1.20 | -1.22 | -1.14 | -1.20 | -1.19 |
| BA2876  | hypothetical protein                                     |               | -1.42 | -1.16 | -1.19 | -1.19 | -1.26 |
| BA2302  | conserved hypothetical protein                           |               | -1.19 | -1.13 | -1.30 | -1.19 | -1.21 |
| BA3858  | DNA-binding protein HU                                   | <i>hup-3</i>  | -1.19 | -1.22 | -1.17 | -1.19 | -1.19 |
| BA4167  | hypothetical protein                                     |               | -1.19 | -1.21 | -0.93 | -1.19 | -1.11 |
| BA4242  | hypothetical protein                                     |               | -1.16 | -1.06 | -1.21 | -1.16 | -1.14 |
| BXA0057 | hypothetical protein                                     |               | -1.15 | -1.12 | -1.24 | -1.15 | -1.17 |
| BA5632  | conserved hypothetical protein                           |               | -1.14 | -1.20 | -1.13 | -1.14 | -1.16 |
| BA5316  | SET domain protein                                       |               | -1.13 | -1.12 | -1.17 | -1.13 | -1.14 |
| BA2013  | general stress protein                                   | <i>dps</i>    | -1.05 | -1.12 | -1.16 | -1.12 | -1.11 |

#### D. Genes downregulated more in the *spxA2* background

| Locus   | GeneN                                             | GeneS         | 8170 vs 8606 |       | Median | Mean  |       |
|---------|---------------------------------------------------|---------------|--------------|-------|--------|-------|-------|
| BA0161  | gluconate operon transcriptional repressor        | <i>gntR</i>   | -3.80        | -4.04 | -3.70  | -3.80 | -3.85 |
| BA0163  | gluconate permease                                | <i>gntP-1</i> | -3.75        | -3.19 | -3.43  | -3.43 | -3.46 |
| BA1581  | spore coat protein D, putative                    |               | -2.62        | -3.26 | -2.70  | -2.70 | -2.86 |
| BA0162  | gluconate kinase, authentic point mutation        |               | -2.41        | -2.97 | -3.17  | -2.97 | -2.85 |
| BA4266  | hypothetical protein                              |               | -2.37        | -2.52 | -1.94  | -2.37 | -2.27 |
| BXA0137 | hypothetical protein,                             |               | -1.63        | -1.65 | -1.51  | -1.63 | -1.60 |
| BA0164  | 6-phosphogluconate dehydrogenase, decarboxylating | <i>yqjI</i>   | -1.32        | -1.28 | -1.32  | -1.32 | -1.31 |
| BA1237  | hypothetical protein                              |               | -1.31        | -1.60 | -1.90  | -1.60 | -1.60 |
| BXA0124 | S-layer protein,                                  |               | -1.29        | -1.88 | -1.86  | -1.86 | -1.68 |
| BA5301  | sodium/alanine symporter family protein           |               | -1.23        | -1.04 | -1.27  | -1.23 | -1.18 |

\*Green shading and negative values represent genes downregulated in mutant strains compared to wild type. Red shading and positive values represent genes upregulated in mutant strains compared to wild type. NaN represents genes where no signal was present in the wild-type or mutant samples. Values are log2 changes. Columns G/L and H/M represent the median and mean value across 3 biological replicate experiments.
